# Supplementary material for: Chemerin expression marks early psoriatic skin lesions and correlates with plasmacytoid dendritic cell recruitment
Source: PubMed Central journal article supplement — J Exp Med. 2009 Jan 19;206(1):249–58. doi: 10.1084/jem.20080129 (PMC2626680; doi:10.1084/jem.20080129), 2009-01-19
Supplement: jem.20080129_1.pdf [file jem.20080129_1.pdf]

## SUPPLEMENTAL MATERIAL

Albanesi et al., <http://www.jem.org/cgi/content/full/jem.20080129/DC1>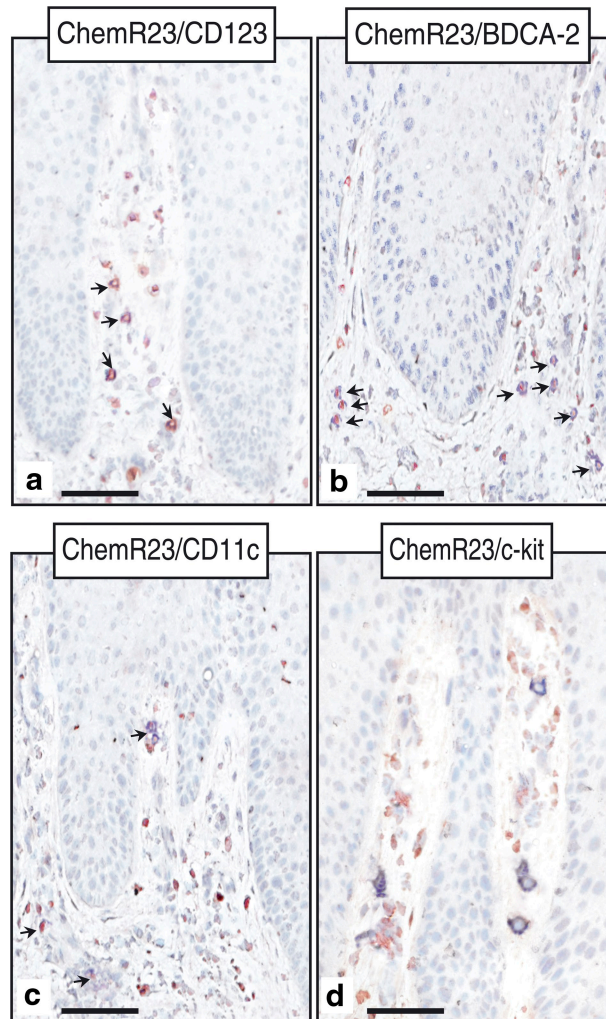

**Figure S1.** ChemR23 expression colocalizes with CD123<sup>+</sup>, BDCA-2<sup>+</sup>, and partially with CD11C<sup>+</sup> but not with c-kit<sup>+</sup> cells. ChemR23 expression was evaluated by double immunohistochemistry in psoriatic plaque lesions (five total patients examined). Anti-ChemR23 mAb (red) immunoreactivity was detected in cells infiltrating the dermis coexpressing CD123 (a) or CD11C (b) but not c-kit (c; all blue). Bars, 20  $\mu$ m.

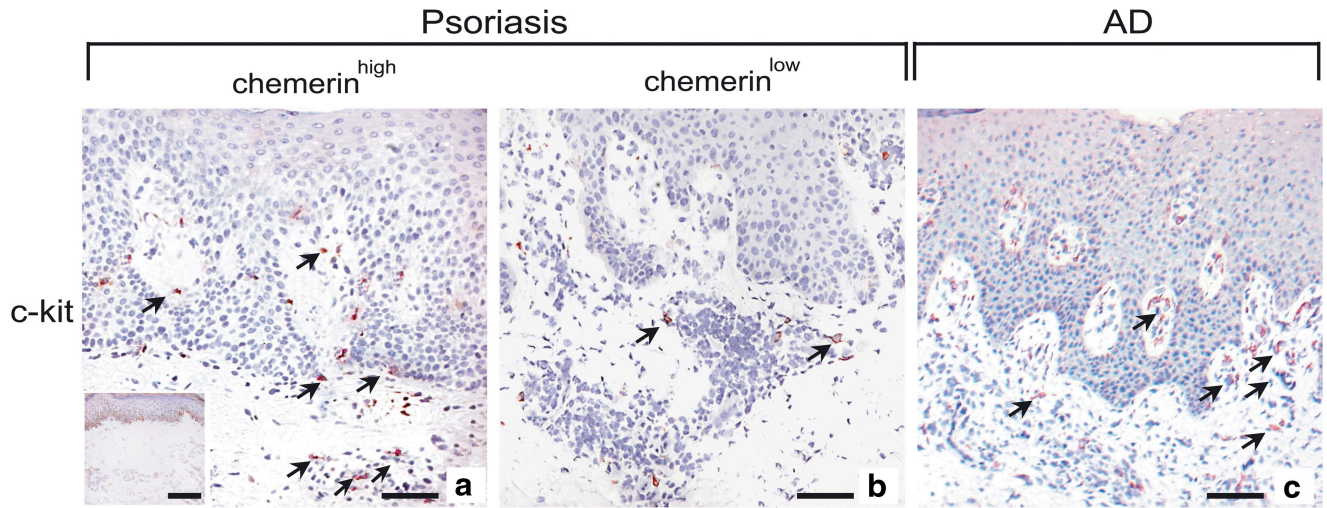

**Figure S2.** C-kit<sup>+</sup> mast cells highly infiltrate the dermis of chemerin<sup>high</sup> psoriatic plaques. Immunohistochemistry was performed using sections from psoriatic skin showing a chemerin<sup>high</sup> ( $n = 5$ ; a) and chemerin<sup>low</sup> ( $n = 7$ ; b) phenotype and from AD lesions ( $n = 5$ ; c). The inset represents staining of uninvolved psoriatic skin, which is highly immunoreactive for c-kit in the basal layer epidermis due to melanocytes. Arrows point to positive cells. Bars, 20  $\mu\text{m}$ .



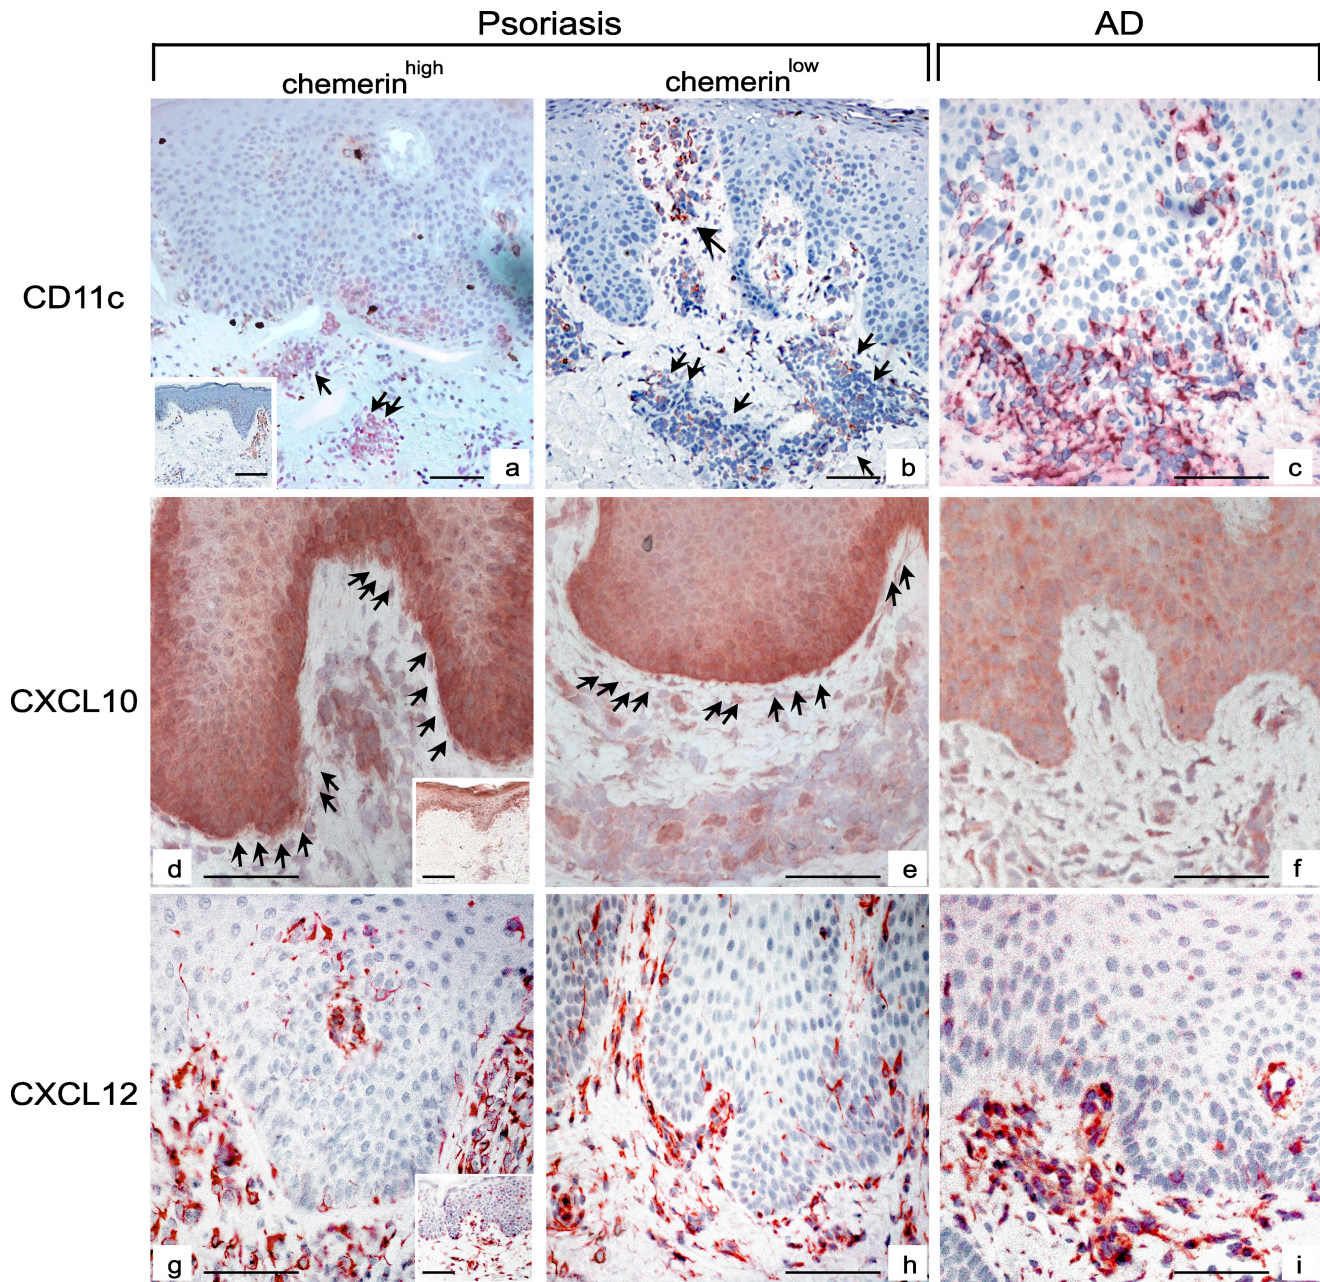

Figure S3. Expression of CD11c, CXCL10, and CXCL12 are similar in chemerin<sup>high</sup> and chemerin<sup>low</sup> psoriatic plaques. Immunohistochemistry was performed using sections from psoriatic skin showing a chemerin<sup>high</sup> ( $n = 5$ ) and chemerin<sup>low</sup> ( $n = 7$ ) phenotype and from AD lesions ( $n = 5$ ). The insets represent staining of uninvolved psoriatic skin. Arrows point to positive cells. Bars, 20  $\mu\text{m}$ .
